# Supplementary material for: An environmentally friendly route for grafting of molybdenum carbonyl onto a diaminosilane-modified SBA-15 molecular sieve and its catalytic behaviour in olefin epoxidation
Source: Royal Society of Chemistry journal article supplement (doi:10.1039/c4nj02402h), 2015-01-01
Supplement: c4nj02402h1.pdf [file c4nj02402h1.pdf]

Supporting information

## Environmentally friendly route for grafting of molybdenum carbonyl on a diaminosilane-modified SBA-15 molecular sieve and its catalytic behaviour in olefin epoxidation

Thangaraj Baskaran,<sup>a</sup> Raju Kumaravel,<sup>a</sup> Jayaraj Christopher,<sup>b</sup> Thalasseril. G. Ajithkumar,<sup>c</sup> Ayyamperumal Sakthivel<sup>\*a</sup>

<sup>a</sup> Department of Chemistry, Inorganic Materials and Catalysis Laboratory, University of Delhi, New Delhi-110007, India, <sup>b</sup> Indian Oil Corporation Ltd, R&D Centre, Faridabad-121007, India

<sup>c</sup> Central NMR Facility, CSIR-National Chemical Laboratory, Pune-411008, India.

E-mail: [asakthivel@chemistry.du.ac.in](mailto:asakthivel@chemistry.du.ac.in)

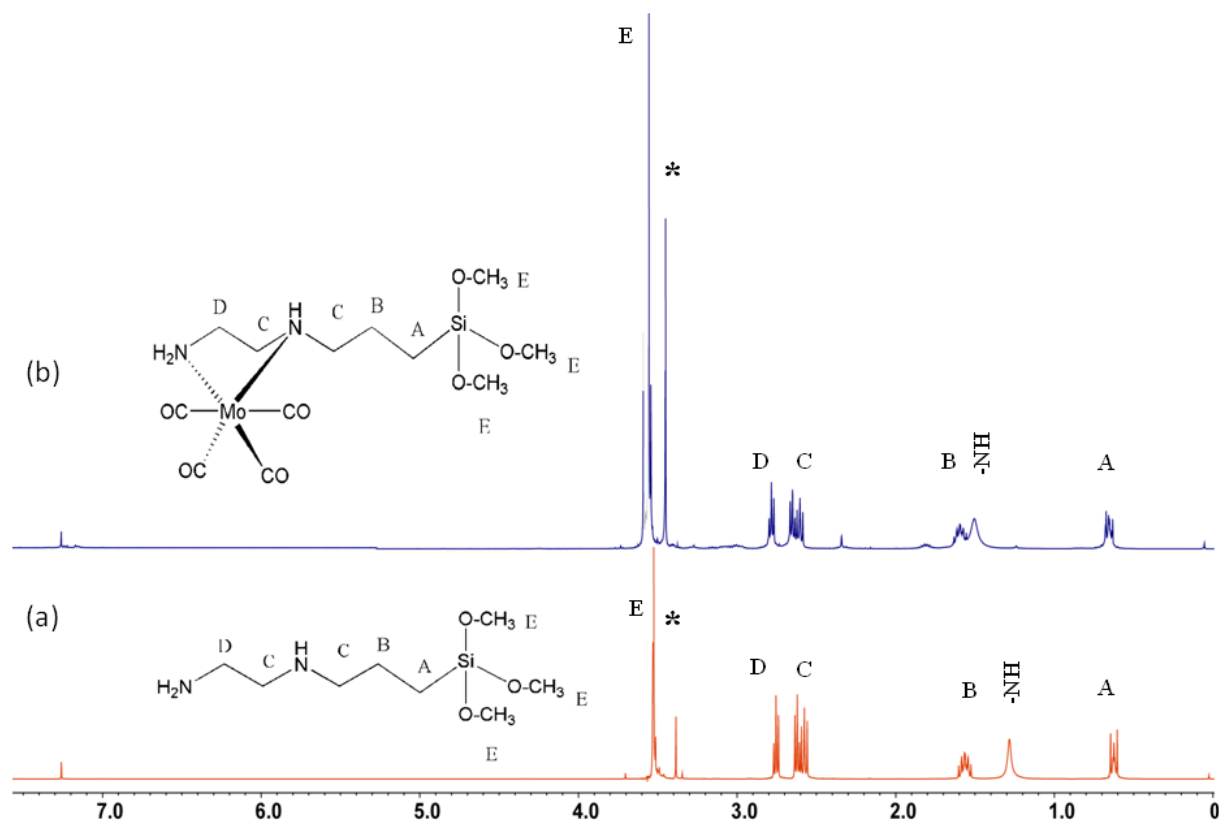

Fig.S1. <sup>1</sup>H-NMR spectrum of Complex1 (\*-Impurity)

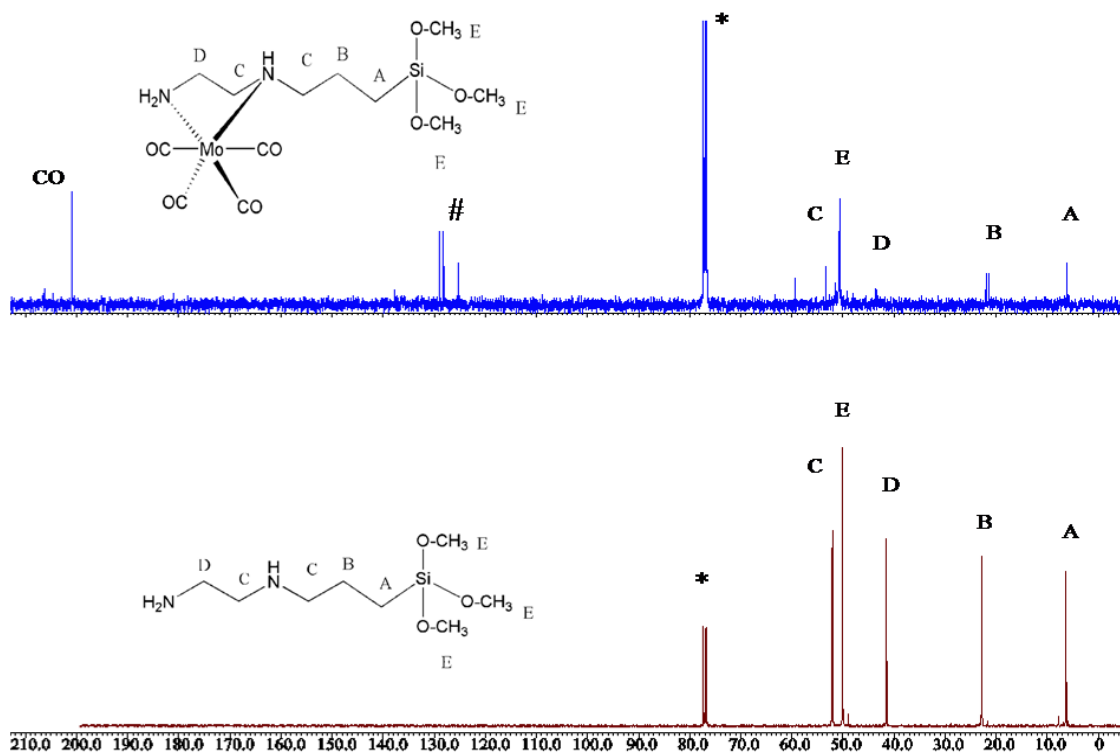

Fig.S2.  $^{13}\text{C}$ -NMR spectrum of Complex 1 (Impurity- $^*\text{CDCl}_3$ , #-toluene)
